# Supplementary material
Source: PubMed Central journal article supplement (PMC1783094)
Supplement: pnas_0607696104_2.pdf [file pnas_0607696104_2.pdf]

| Gene                 | Sequence  |            | Location | Accession No. |           |
|----------------------|-----------|------------|----------|---------------|-----------|
| consensus ERRE       | TCAAGGTCA |            |          |               |           |
| <i>Acadm</i> , mouse | GAGCC     | CGAAGGTCA  | CGTTC    | -458 to -466  | NM_007382 |
| <i>Acadm</i> , rat   | GAGCC     | CGAAGGTCTG | CGTCC    | -430 to -438  | NM_016986 |
| <i>Acadm</i> , mouse | CCAAG     | TAAAGGTCA  | CAGCT    | -558 to -550  | NM_007382 |
| <i>Acadm</i> , rat   | CCGAG     | TAAAGGTCA  | CAACT    | -529 to -521  | NM_016986 |
| <i>ACADM</i> , human | CCGGG     | TAAAGGTGA  | AGGCT    | -330 to -338  | NM_000016 |
| <i>Aco2</i> , mouse  | AACAG     | TCAAGGTCA  | AACTG    | +984 to +976  | NM_080633 |
| <i>Aco2</i> , rat    | AACAG     | TCAAGGTCA  | AACTG    | +940 to +932  | NM_024398 |
| <i>ACO2</i> , human  | GGGAG     | TCAAGGTCA  | AACTG    | +961 to +953  | NM_001098 |
| <i>Atp5b</i> , mouse | CAAGC     | TCAAGGTCA  | CGGGG    | +197 to +198  | NM_016774 |
| <i>Atp5b</i> , rat   | CAGGC     | TCAAGGTCA  | CGGGG    | +198 to +190  | NM_134364 |
| <i>ATP5B</i> , human | CCGGC     | TCAAGGTCA  | TGGGG    | +281 to +289  | NM_001686 |
| <i>Atp5b</i> , mouse | AAGGT     | CCAAGGACA  | GTCAA    | -322 to -318  | NM_016774 |
| <i>Atp5b</i> , rat   | AAAGT     | CCAAGGACA  | GTCAA    | -318 to -314  | NM_134364 |
| <i>ATP5B</i> , human | AAAGC     | CCAAGGACA  | GGCAA    | -253 to -245  | NM_001686 |
| <i>Cycs</i> , mouse  | CTAGC     | CCAAGGACA  | CGCCG    | -4 to -12     | NM_007808 |
| <i>Cycs</i> , rat    | CTAGC     | CCAAGGACA  | CGCCG    | -4 to -12     | NM_012839 |
| <i>CYCS</i> , human  | TAAGT     | CCAAGGACA  | CGCCG    | -5 to -13     | NM_018947 |
| <i>Cpt1b</i> , mouse | TAGGG     | AAAAGGTCA  | CCAGG    | -754 to -762  | NM_009948 |
| <i>Cpt1b</i> , rat   | TAGGG     | AAAAGGTCA  | CCAGG    | -293 to -301  | NM_013200 |
| <i>CPT1B</i> , human | TAGGG     | AAAAGGTCA  | CCGAT    | -233 to -241  | NM_004377 |
| <i>Idh3a</i> , mouse | CGGCG     | TCAAGGTCA  | AGGCG    | +220 to +228  | NM_029573 |
| <i>Idh3a</i> , rat   | CGGCG     | TCAAGGTCA  | AGGCG    | +244 to +252  | NM_053638 |
| <i>IDH3A</i> , human | CGGCG     | TCAAGGTCA  | AGGCG    | +284 to +292  | NM_005530 |
