# Supplementary material
Source: PubMed Central journal article supplement (PMC1783094)

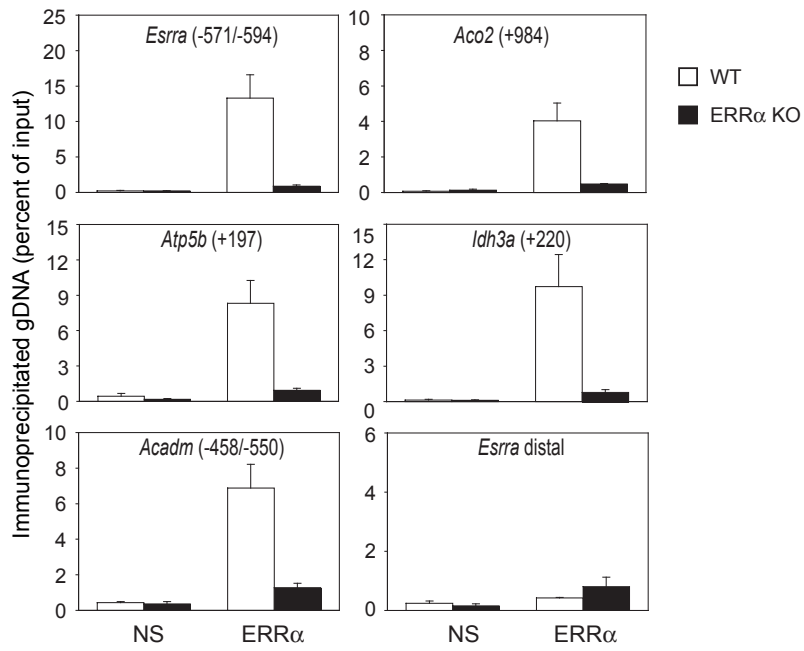

Supplement: pnas_0607696104_1.pdf [file pnas_0607696104_1.pdf]

**A**

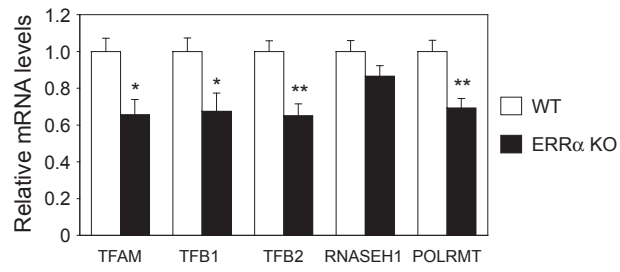

**B**

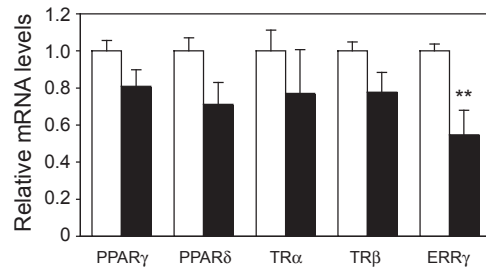

**C**

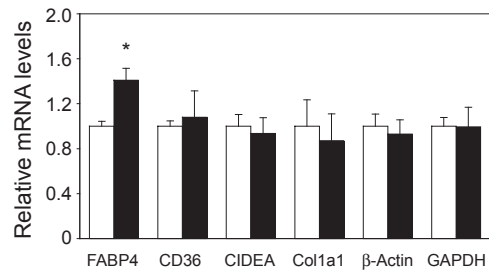

Supplement: pnas_0607696104_3.pdf [file pnas_0607696104_3.pdf]

A

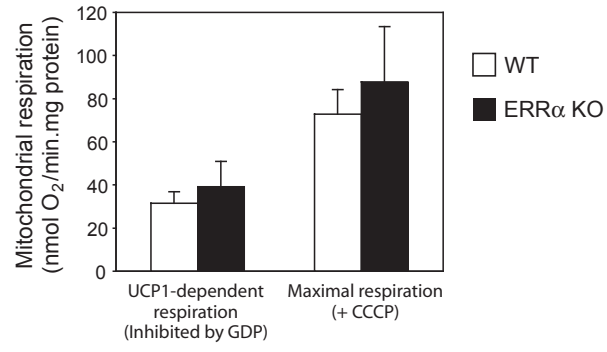

B

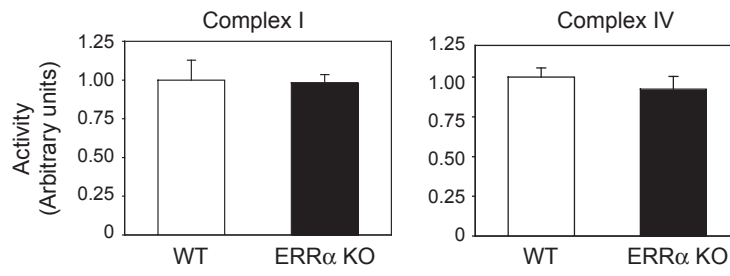

Supplement: pnas_0607696104_4.pdf [file pnas_0607696104_4.pdf]

A

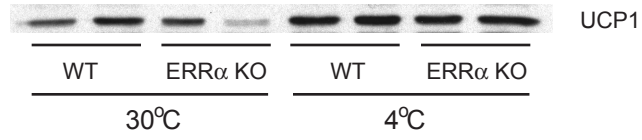

B

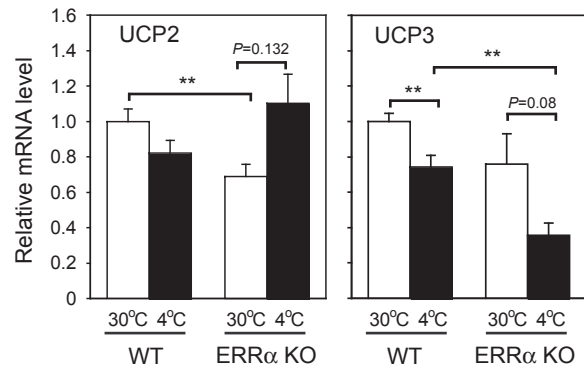

Supplement: pnas_0607696104_5.pdf [file pnas_0607696104_5.pdf]

**A**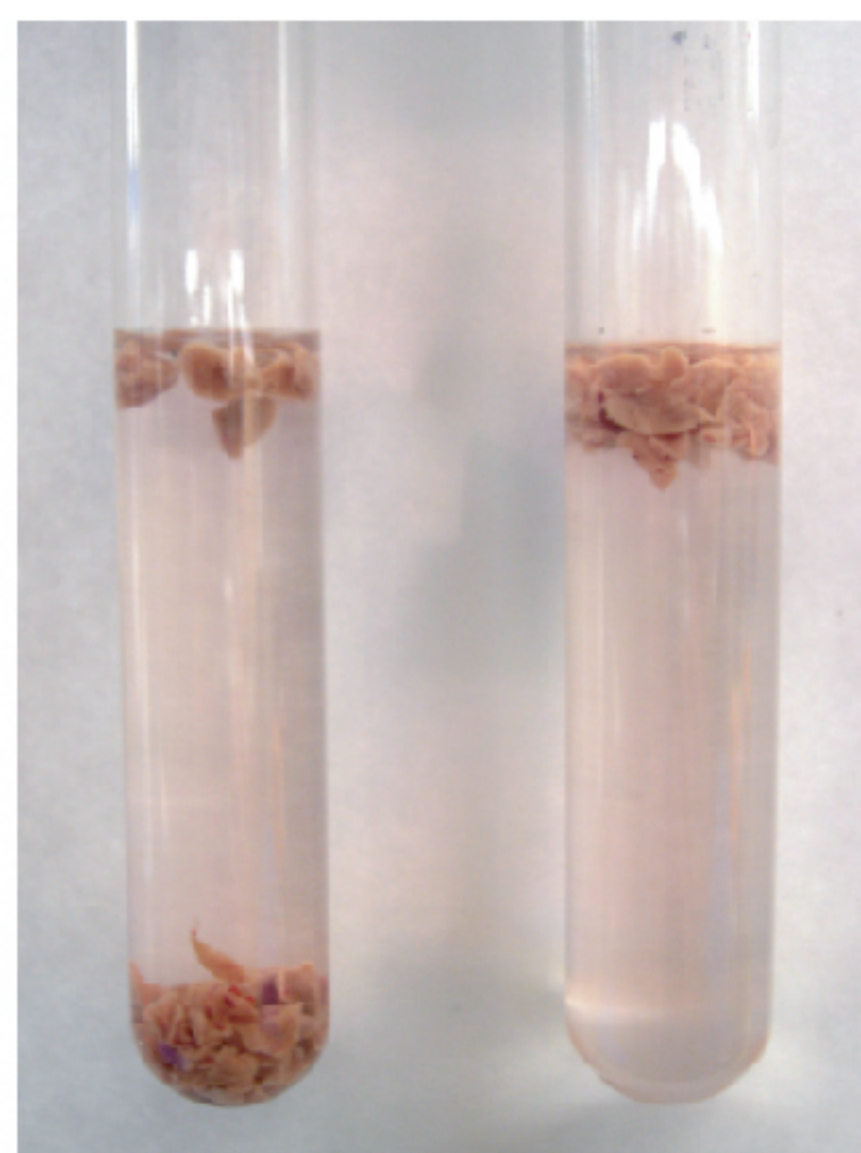

WT

ERR $\alpha$  KO**B**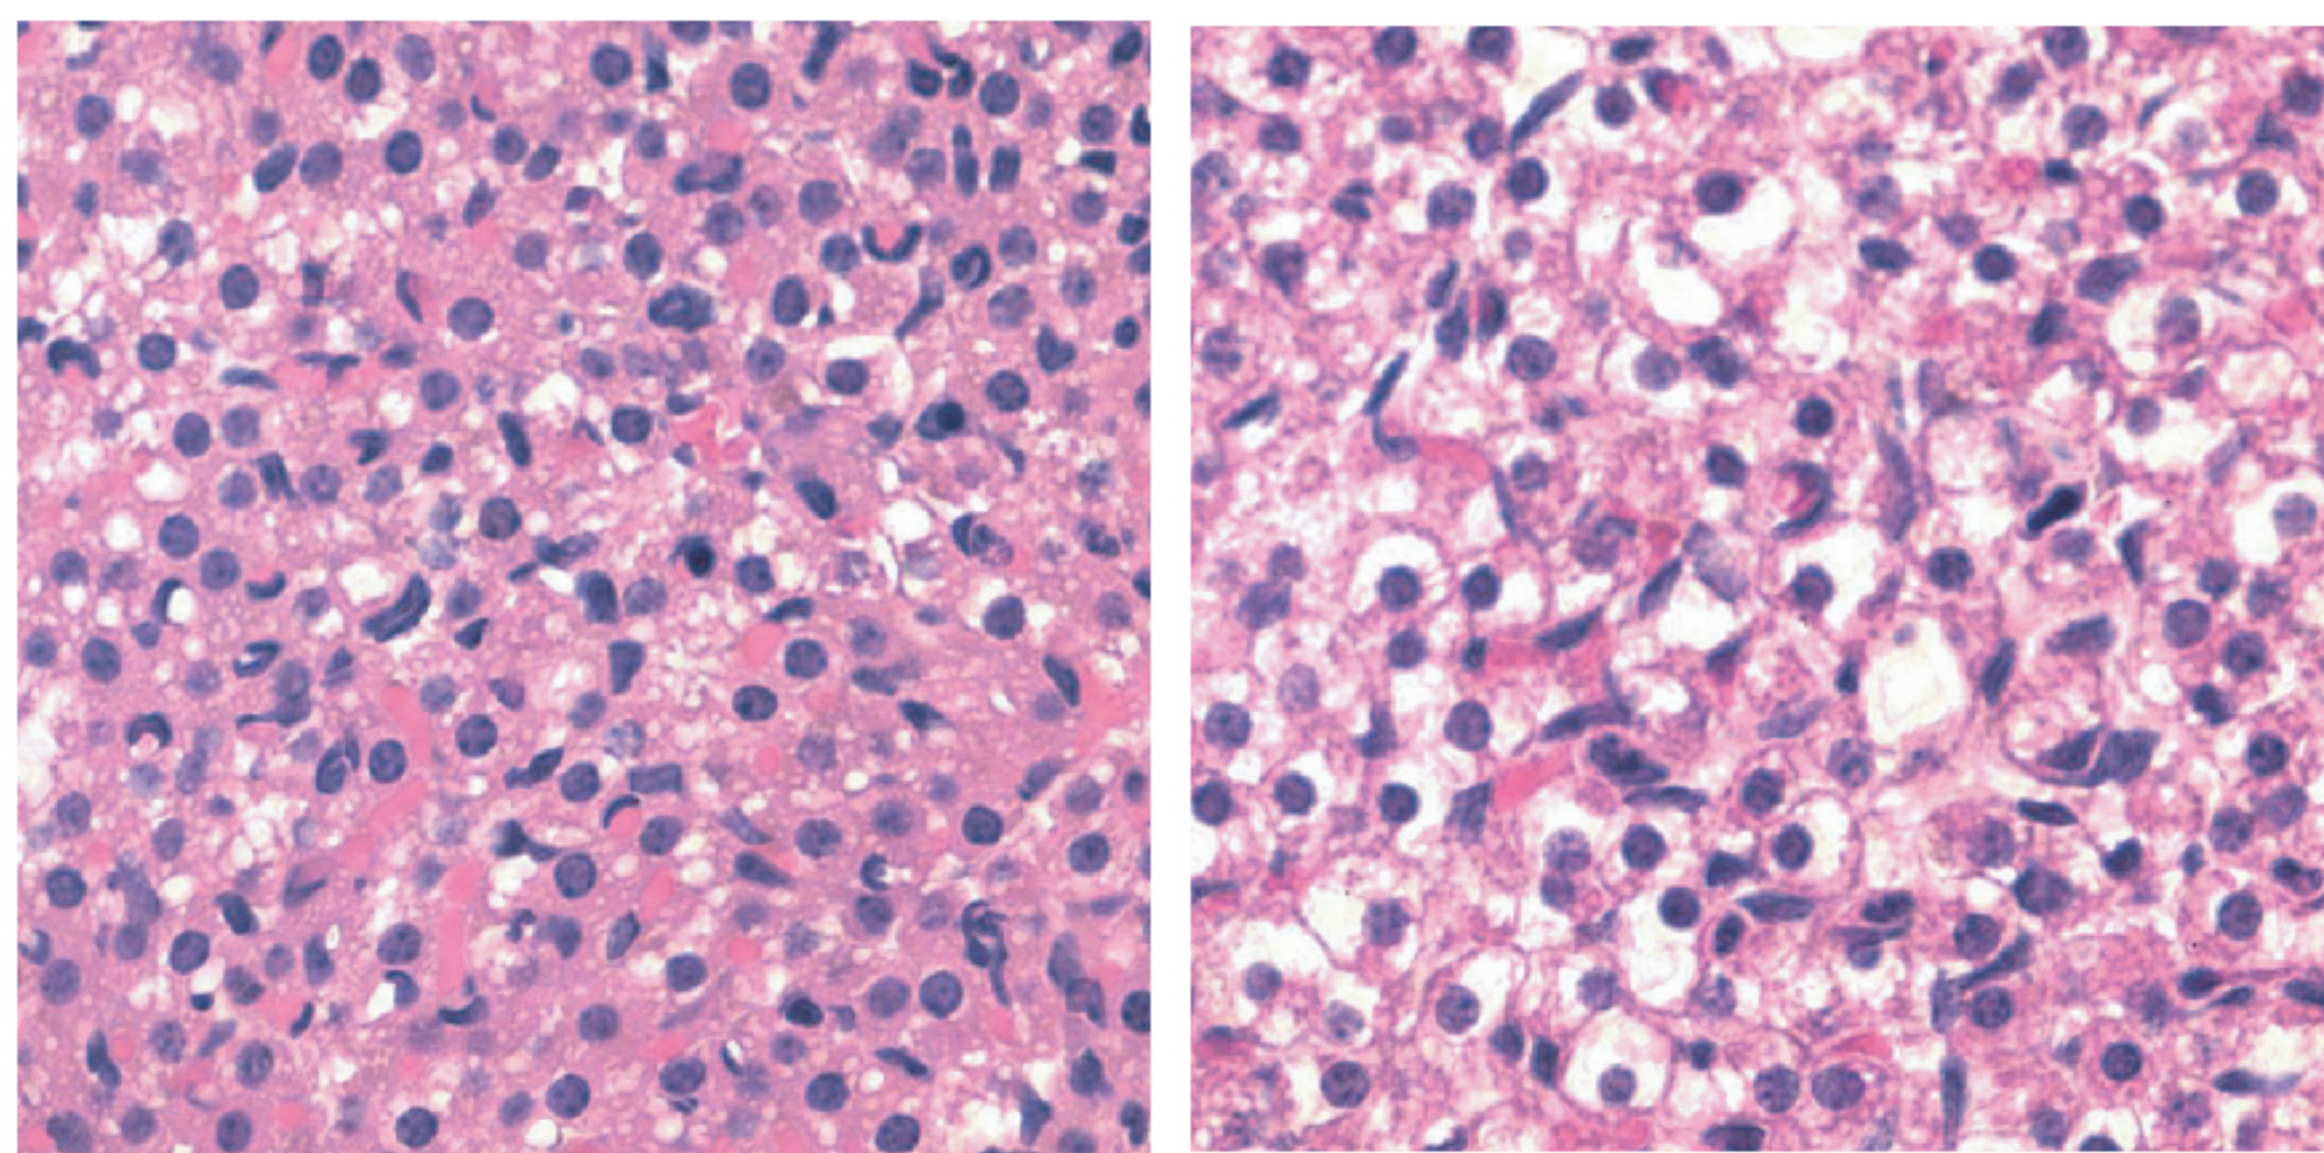

WT

ERR $\alpha$  KO**C**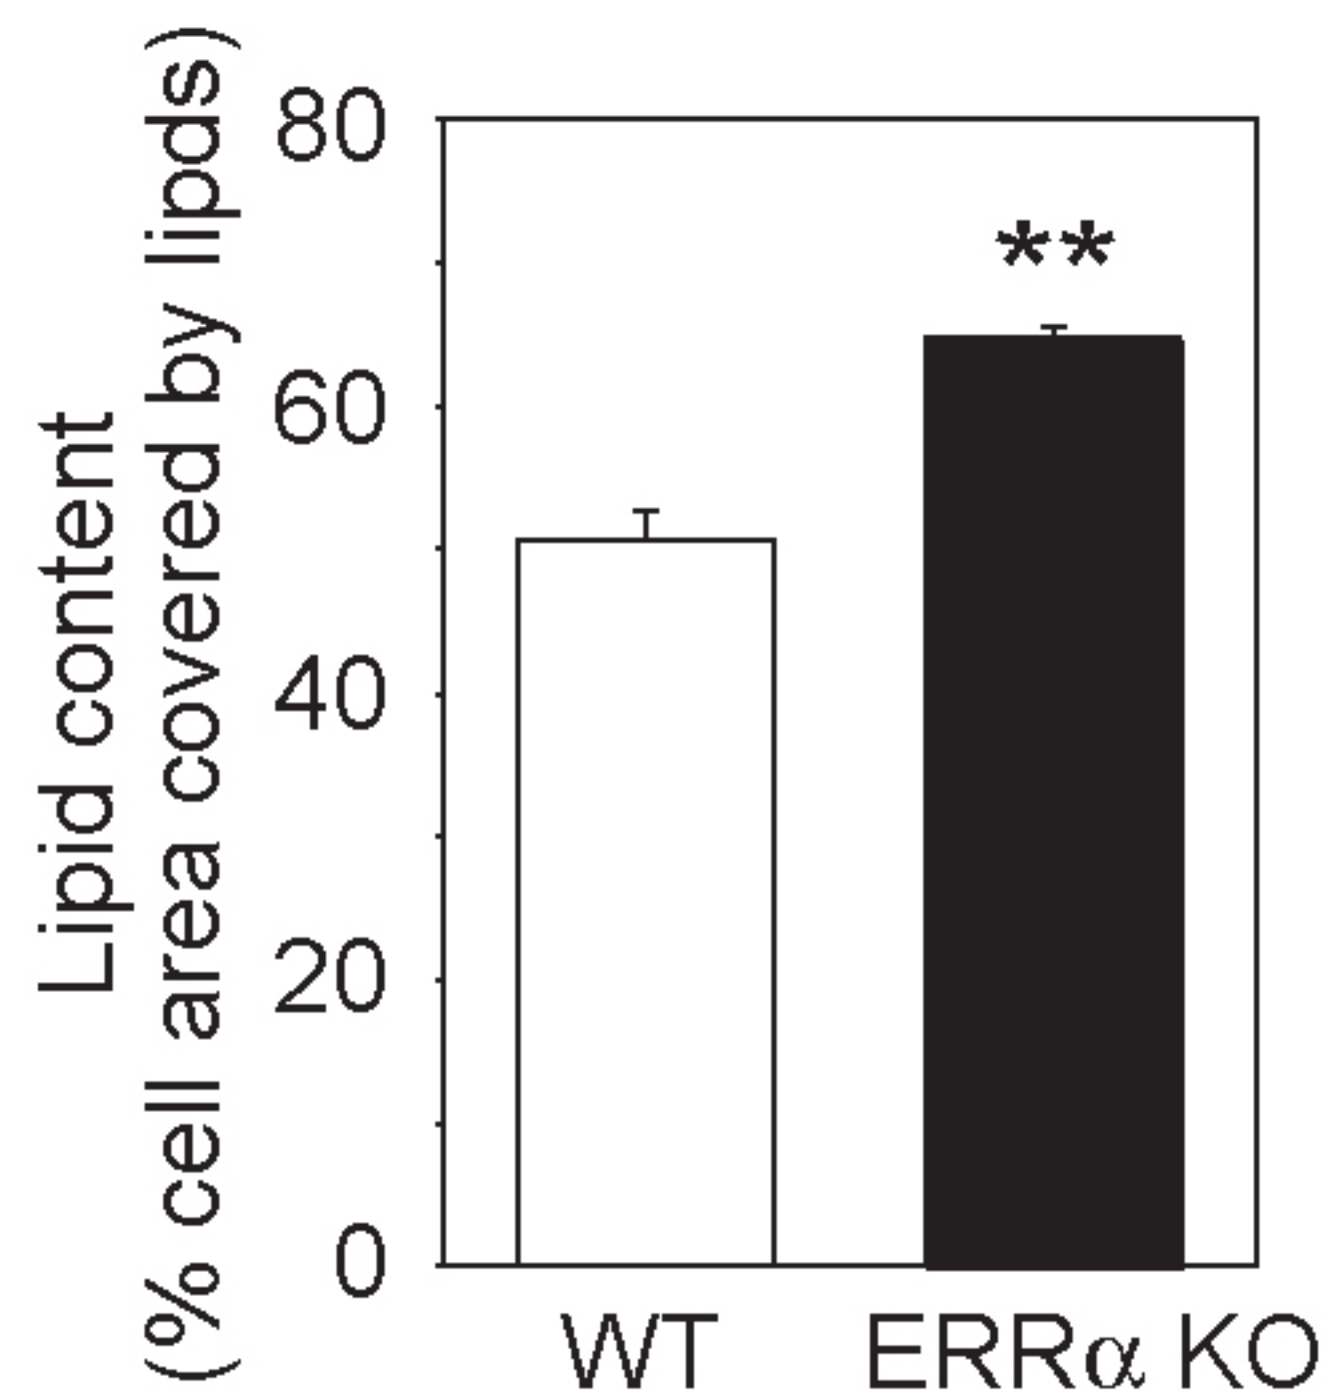**D**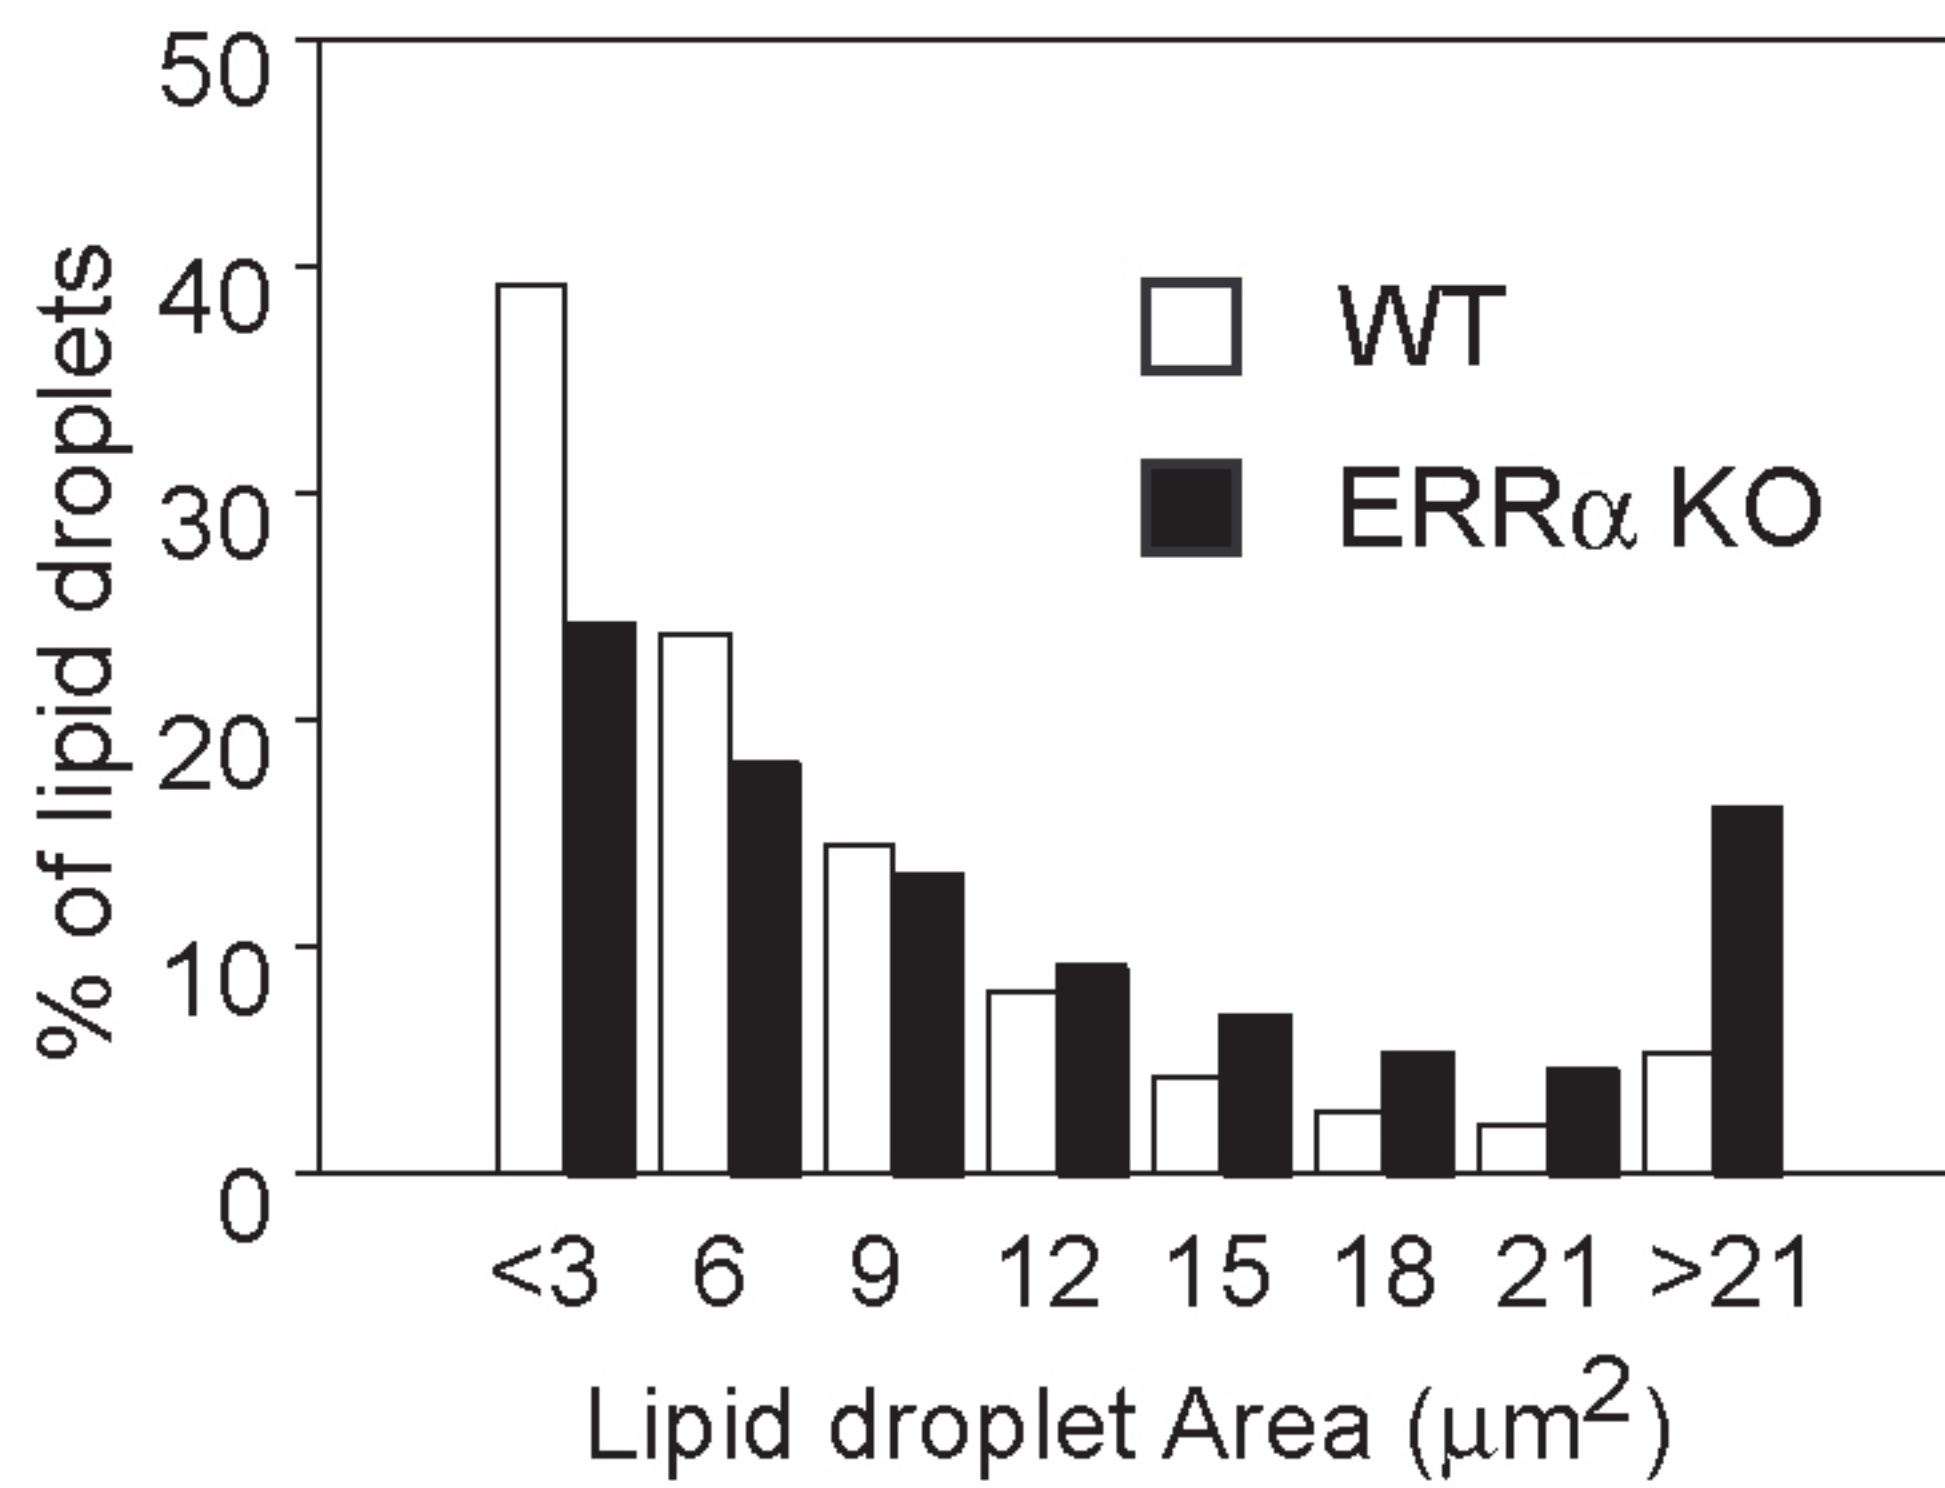

Supplement: pnas_0607696104_6.pdf [file pnas_0607696104_6.pdf]
